# Supplementary material for: NAAA-regulated lipid signaling in monocyte-derived cellscontrols the induction of hyperalgesic priming
Source: Research Square preprint supplement (doi:10.21203/rs.3.rs-3263903/v1), 2023-08-19
Supplement: Supplementary file 1 [file 150a5effd871ce2a63fb3e05.xlsx]

## Sheet: Figure S3
	Fig.S3 A	GBP							Veh
	BL	15	12.3	13.68	14.49	14.735	12.31	11.425	13.64	13.93	12.53	15	14.51	13.975	11.905
	1h	13.605	5.56	8.905	12.015	3.385	5.54	4.705	10.085	7.725	4.06	7.645	8.76	10.51	2.32
	3h	11.18	5.985	8.205	9.415	5.21	5.005	4.41	6.245	4.3	7.71	4.62	3.9	8.9	5.71
	6h	4.2	11.725	13.11	5.51	7.025	5.43	3.015	6.49	8.175	6.885	7.78	8.79	7.78	5.085
	d1	14.33	12.16	15	12.71	8.925	11.355	11.975	11.33	12.28	7.99	9.685	12.68	12.63	10.905
	Fig.S3 B	GBP							Veh
	1h	5.85	3.81	2.475	3.955	2.425	5.705	4.395	3.76	4.27	4.43	5.185	3.595	4.565	3.735
	3h	5.235	3.065	4.37	2.215	3.845	6.475	3.67	2.645	5.035	6.145	2.415	3.545	5.05	3.85
	6h	5.35	4.555	5.85	5.075	3.235	4.7	4.255	4.07	3.795	3.425	5.24	3.2	4.28	5.05
