# Supplementary material for: NAAA-regulated lipid signaling in monocyte-derived cellscontrols the induction of hyperalgesic priming
Source: Research Square preprint supplement (doi:10.21203/rs.3.rs-3263903/v1), 2023-08-19
Supplement: Supplementary file 2 [file 2357cb2666f44cf64cc842d2.xlsx]

## Sheet: Figure S2
	Fig.S2 B1	GBP						Veh
	BL	10.175	8.855	8.675	9.975	9.14	9.005	11.04	10.23	9.77	11.975	7.62	8.57
	1h	10.89	7.865	8.465	9.495	9.51	8.485	5.835	3.5	3.36	5.335	3.145	4.05
	3h	8.215	9.215	9.255	10.705	7.74	9.7	3.53	3.895	4.835	3.91	3.99	4.855
	6h	7.7	3.05	2.84	4.3	8.525	5.08	4.245	2.245	4.01	3.9	3.42	2.07
	d1	3.405	1.77	4.93	3.985	4.11	1.635	4.07	3.85	2.32	5	4.255	3.16
	d2	8.23	10.22	8.895	9.985	9.02	4.035	13.05	10.545	11.925	9.65	10.355	8.935
	Fig.S2 B2	GBP						Veh
	1h	2.44	3.375	1.775	1.82	1.795	1.8	3.775	3.825	2.395	2.365	3.085	2.72
	3h	2.02	1.665	1.965	2.07	2.245	1.615	3.54	2.035	1.88	1.645	1.655	1.705
	6h	1.425	3.265	2.35	1.915	2.815	2.63	6.05	4.465	2.165	2.815	2.695	2.715
	Fig.S2 C1	ARN							Veh
	BL	10.62	10.07	10.345	9.14	11.03	8.59	10.545	11.04	10.23	9.77	11.975	7.62	8.57
	1h	9.555	9.78	7.34	7.825	9.485	9.205	9.17	5.835	3.5	3.36	5.335	3.145	4.05
	3h	9.645	10.075	7.74	7.41	9.62	8.56	9.81	3.53	3.895	4.835	3.91	3.99	4.855
	6h	8.795	9.265	4.42	4.405	8.605	11.2	6.685	4.245	2.245	4.01	3.9	3.42	2.07
	d1	10.69	10.04	7.26	3.855	6.295	9.135	10.435	4.07	3.85	2.32	5	4.255	3.16
	d2	10.925	11.515	8.14	6.505	8.86	9.94	10.77	13.05	10.545	11.925	9.65	10.355	8.935
	Fig.S2 C2	ARN							Veh
	1h	5.93	2.27	3.16	4.9	5.625	2.335	6.14	3.775	3.825	2.395	2.365	3.085	2.72
	3h	4.755	3.13	2.465	1.965	3.565	3.625	3.38	3.54	2.035	1.88	1.645	1.655	1.705
	6h	8.87	4.5	4.66	3.945	6.15	3.755	3.035	6.05	4.465	2.165	2.815	2.695	2.715
	Fig.S2 D1	Veh						ARN
	BL	14.045	10.065	10.36	9.5	10.92	11.25	9.37	13.07	10.97	12.85	13.145	6.06	10.07	9.55	8.615
	1h	4.86	3.25	4.74	5.01	4.17	3.22	3.515	9.655	4.245	7.845	3.07	3.65	5.9	5.165	4.44
	3h	4.19	5.9	2.2	2.6	4.92	3.79	3.425	5.21	4.535	6.035	4.985	4.23	4.925	5.155	4.44
	6h	3.98	3.87	4.46	3.07	5.99	3.21	3.535	6.975	7.53	5.115	7.49	6.78	8.92	4.275	4.005
	d1	6.75	3.97	8.17	7.06	6.95	6.71	6.41	5.7	5.12	3.09	6.49	5.05	9.08	8.23	6.39
	d2	13.09	10.61	10.59	9.56	10.5	10.83	10.86	14.57	9.43	12.61	11.6	7.07	11.06	10.87	7.6
	Fig.S2 D2	Veh						ARN
	1h	2.77	1.51	1.72	2.49	1.81	1.65	6.255	2.735	2.175	5.305	3.47	4.85	4.85	3.83	9.865
	3h	3.72	6.36	3.66333	3.67	4.02	3.965	11.685	9.11	6.035	11.295	3.87	11.345	8.935	8.26	5.125
	6h	5.38	4.72	2.96	5.78	5.42	2.91	10.735	11.86	8.025	8.66	13.3	11.72	11.98	15	9.7
