# Supplementary material for: NAAA-regulated lipid signaling in monocyte-derived cellscontrols the induction of hyperalgesic priming
Source: Research Square preprint supplement (doi:10.21203/rs.3.rs-3263903/v1), 2023-08-19
Supplement: Supplementary file 3 [file 253d250a62b2e18087c6342c.xlsx]

## Sheet: Figure S4
	Fig.S4 B1	Veh								ARN
	BL	14.52	15	15	14.79	15	14.835	12.69	12.885	13.085	15	13.84	15	14.59	14.645	13.975	14.925
	1h	9.04	3.42	6.9	3.18	5.75	10.065	4.615	4.52	6.785	4.995	4.72	4.68	2.73	7.13	9.36	6.01
	3h	4.755	5.43	6.105	5.195	3.975	2.895	2.81	4.705	10.71	7.175	4.985	5.99	3.505	4.08	7.3	3.785
	6h	2.125	7.025	6.195	5.02	2.755	5.35	1.825	3.355	7.5	5.715	4.14	4.005	7	5.895	2.7	3.4
	d1	15	6.365	13.255	12.075	14.96	11.91	8.88	11.905	13.785	8.895	12.325	11.74	14.05	8.72	14.98	15
	Fig.S4 B2	Veh								ARN
	1h	2.31	3.53	2.835	2.475	4.655	7.51	3.06	2.88	6.975	12.875	7.81	6.69	10.88	7.015	6.32	11.015
	3h	4.35	9.725	6.465	3.03	4.42	3.17	3.99	3.29	14.405	9.525	7.83	13.815	15	11.86	12.745	12.355
	6h	7.405	6.22	7.145	5.405	6.6	6.705	5.9	4.985	14.49	12.73	13.39	13.79	13.675	7.69	10.445	14.95
	Fig.S4 C1	Veh										ARN19702
	BL	13.81	15	12.375	11.74	13.295	12.965	14.52	11.97	14.335	12.78	13.99	15	13.855	12.35	15	13.46	13.995	13.405	11.805	15	15	14.58
	1h	2.865	3.31	2.01	1.99	2.275	2.52	2.235	2.58	2.29	5.395	2.12	4.655	5.07	2.315	9.09	3.89	2.58	3.28	3.835	5.54	4.295	3.855
	3h	2.3	3.63	2.28	2.075	2.855	3.76	2.145	2.605	1.94	2.16	2.505	2.43	2.6	2.89	3.47	2.82	2.58	1.965	2.225	2.795	1.94	2.16
	d1	5.205	9.435	5.89	3.35	4.19	4.125	3.045	2.405	3.79	1.77	2.51	5.015	6.395	3.595	3.62	4.745	3.27	3.315	7.17	4.155	3.53	4.23
	d6	11.965	14.27	11.46	13.94	10.6	9.97	13.345	12.89	10.935	15	8.22	14.09	13	14.26	14.16	11.29	10.655	12.38	9.455	13.85	14.185	15
	Fig.S4 C2	Veh										ARN19702
	1h	4.975	2.48	2.735	2.395	2.07	2.675	2.065	2.93	3.48	4.175	2.775	6.785	4.365	2.845	10.585	2.93	6.03	1.65	3.225	5.69	6.005	2.955
	3h	5.49	5.96	5.585	3.715	5.855	5.78	4.56	5.995	4.6	7.34	13.17	14.875	6.755	15	9.34	14.715	4.975	11.565	5.175	4.66	14.785	13.235
	6h	6.695	4.94	4.625	5.385	6.27	6.38	2.6	2.6	5.66	3.325	10.51	11.08	11.97	13.205	8.295	14	7.33	9.805	14.26	4.8	14.655	14.86
	Fig.S4 D1	Wt							Naaa +/-								Naaa -/-
	BL	13.81	15	12.38	11.74	13.3	12.97	14.52	13.52	14.89	11.16	10.86	14.83	14.89	13.63	12.94	12.92	13.86	11.95	13.68	13.6	15	12.03
	1h	2.87	3.31	2.01	1.99	2.28	2.52	2.24	5.66	3.75	4.8	5.9	6.29	5.77	2.83	3.87	7.71	8.45	12.72	4.05	8.31	8.68	6.74
	3h	2.3	3.63	2.28	2.08	2.86	3.76	2.15	1.73	4.66	1.46	1.54	1.57	1.86	2.38	2.07	3.06	1.71	2.42	2.88	2.51	3.85	3.13
	d1	5.21	9.44	5.89	3.35	4.19	4.13	3.05	10.29	8.41	10.79	4.1	3.69	2.96	3.72	5.55	13.54	11.27	6.35	4.19	7.67	14.88	4.6
	d6	11.97	14.27	11.46	13.94	10.6	9.97	13.35	12.09	12.82	11.25	14.44	9.49	14.3	10.28	8.72	13.21	13.49	10.7	13.85	10.7	13.12	9.36
	Fig.S4 D2	Wt							Naaa +/-								Naaa -/-
	1h	4.98	2.48	2.74	2.4	2.07	2.68	2.07	2.2	2.27	1.93	1.58	2.45	1.73	1.36	2.91	11.4	3.76	6.32	4.39	2.54	3.58	4.39
	3h	5.49	5.96	5.59	3.72	5.86	5.78	4.56	4.09	3.92	5.48	4.32	4.25	3.68	3.97	4.715	9.44	13.66	11.14	13.12	8.05	15	12.26
	6h	6.7	4.94	4.63	5.39	6.27	6.38	2.6	7.71	4.07	6.23	6.65	3.11	4.13	5.13	4.575	13.49	11.79	13.78	12.24	12.6	11.49	11.73
