# Supplementary material for: NAAA-regulated lipid signaling in monocyte-derived cellscontrols the induction of hyperalgesic priming
Source: Research Square preprint supplement (doi:10.21203/rs.3.rs-3263903/v1), 2023-08-19
Supplement: Supplementary file 4 [file 3081d3dcd9e6d7ba54c77b1c.xlsx]

## Sheet: Fig. 1
	Fig.1 B1	ARN								Veh
	BL	14.335	15	15	13.835	15	11.53	13.87	13.445	12.115	13.375	15	13.565	15	13.88	15	14.715
	1h	15	4.835	9.95	3.655	15	12.385	12.145	14.25	6.725	6.345	8.85	5.315	5.85	6.36	4.835	3.715
	3h	15	10.88	12.1	4.975	13.5	11.235	15	13.505	5.545	4.77	4.095	6.43	5.585	7.14	7.275	6.13
	6h	15	4.995	10.435	5.66	8.33	10.18	13.47	12.54	4.34	7.675	5.18	5.085	12.875	7.045	8.28	8.83
	d1	13.25	7.43	14.17	13	11	13.465	14.37	9.25	11.66	14.625	12.865	12.44	15	12.64	13.45	14.755
	Fig.1 B2	ARN								Veh
	1h	13.47	6.61	3.705	4.82	8.14	3.455	7	3.41	3.02	4.395	5.81	5.24	4.29	9.22	4.07	6.785
	3h	9.625	8.595	8.165	10.72	14.205	2.92	4.685	4.2	4.845	5.96	5.675	4.26	6.165	5.045	2.98	6.665
	6h	8.6	13.965	11.05	5.115	9.4	4.385	6.065	4.075	6.51	3.58	5.9	5.2	4.81	5.085	12.36	6.23
	Fig.1 C1	GBP								Veh
	BL	13.805	13	13.6	13.7	12.445	11.555	11.07	14.515	12.115	13.375	15	13.565	15	13.88	15	14.715
	1h	13.595	10.845	12.215	14.005	13.06	10.935	12.845	11.735	6.725	6.345	8.85	5.315	5.85	6.36	4.835	3.715
	3h	12.47	13.465	12.98	11.955	11.23	13.1	11.775	11.965	5.545	4.77	4.095	6.43	5.585	7.14	7.275	6.13
	6h	12.665	11.17	11.925	4.395	7.265	6.15	4.805	3.45	4.34	7.675	5.18	5.085	12.875	7.045	8.28	8.83
	d1	12.175	13.32	6.53	6.04	12.465	11.425	14.09	14.805	11.66	14.625	12.865	12.44	15	12.64	13.45	14.755
	Fig.1 C2	GBP								Veh
	1h	7.205	6.375	6.5	4.39	14.465	9.02	3.14	6.355	3.02	4.395	5.81	5.24	4.29	9.22	4.07	6.785
	3h	5.39	5.325	3.585	4.325	5.07	4.795	5.025	5.655	4.845	5.96	5.675	4.26	6.165	5.045	2.98	6.665
	6h	4.38	2.745	3.995	2.205	9.065	7.23	5.085	5.31	6.51	3.58	5.9	5.2	4.81	5.085	12.36	6.23
	Fig.1 D1	Veh																	ARN
	BL	12.7	15	13.37	13.8	12.54	14.44	15	12.03	15	13.76	14.59	9.85	13.88	12.235	14.315	9.35		13.9	15	12.25	10.59	13.1	12.04	15	12.45	13.28	12.55	14.05	7.38	13.46	13.345	13.85	14.105	14.905
	1h	4.82	4.82	6.82	5.51	7.13	8.56	3.28	6.26	5.52	10.44	5.205	6.33	7.685	2.665	4.085	4.59		5.52	4.87	3.42	6.85	4.66	6.86	4.09	6.77	4.19	5.28	11.6	5.385	5.28	6.285	5.83	7.41	6.345
	3h	4.11	8.09	6.87	8.36	5.38	10.04	5.05	6.51	5.17	9.75	5.24	3.06	9.685	6.995	5.02	6.805		6.74	10.59	5.88	5.86	5.66	5.51	5.65	3.41	5.91	6.66	13.8	3.63	5.46	3.725	4	7.205	5.125
	6h	4.21	11.57	6.43	5	15	6.43	4.29	9.85	4.11	7.26	4.97	4.175	10.29	2.725	4.62	6.13		7.24	11.49	3.68	3.12	15	2.71	9.08	10.11	3.68	15	14.65	2.96	7.005	3.525	3.48	7.855	7.875
	d1	15	15	8.67	13.68	15	7.74	15	8.36	11.66	9.56	15	15	12.12	13.35	7.76	12.15		15	14.07	11.7	15	15	15	8.42	8.67	8.51	14.23	15	7.695	13.515	8.455	13.905	6.71	13.77
	Fig.1 D2	Veh																	ARN
	1h	2.54	14.13	7.74	3.86	4.27	3.115	2.6	2.855	4.49	6.355	5.58	3.96	7.11	3.405	4.29	2.295		13.7	10.2	13.37	9.42	11.07	4.7	9.71	5.07	3.16	4.14	15	11.85	4.995	6.84	6.63	6.26	15
	3h	4.7	15	3.87	3.955	5.72	4.13	1.43	5.26	4.58	3.865	4.015	5.445	4.29	3.565	4.76	2.485		15	14.235	13	13.885	15	14.115	10.32	12.34	12.295	14.305	15	10.245	8.125	10.775	8.65	2.365	13.04
	6h	3.055	6.775	9.865	15	5.09	14.25	2.91	2.715	13.555	1.765	3.99	3.175	3.43	4.865	4.265	4.87		14.335	15	10.29	14.18	12.44	14.345	12.9	12.825	13.715	12.98	14.105	10.82	10.665	10.03	6.615	5.595	11.085
	Fig.1 E1	Veh										ARN
	1h	2.54	14.13	7.74	3.86	4.27	3.115	2.6	2.855	4.49	6.355	8.11	9.93	13.425	6.975	7.48	7.1	6.335	5.685	7.925	5.865
	3h	4.7	15	3.87	3.955	5.72	4.13	1.43	5.26	4.58	3.865	12.915	10.03	10.675	5.325	7.145	11.28	6.32	4.73	7.435	4.545
	6h	3.055	6.775	9.865	15	5.09	14.25	2.91	2.715	13.555	1.765	10.095	11.075	12.465	8.895	10.285	6.93	6.425	5.115	8.295	7.01
	Fig.1 E2	Veh										ARN
	1h	2.54	14.13	7.74	3.86	4.27	3.115	2.6	2.855	4.49	6.355	14.425	4.24	6.205	8.14	7.23	4.815	4.18	2.945	11.56	4.33
	3h	4.7	15	3.87	3.955	5.72	4.13	1.43	5.26	4.58	3.865	12.675	11.585	5.835	7.685	12.36	8.115	3.01	3.32	7.425	5.035
	6h	3.055	6.775	9.865	15	5.09	14.25	2.91	2.715	13.555	1.765	8.47	10.955	7.63	8.72	6.825	7.085	4.538	5.435	7.53	6.47
	Fig.1 E3	Veh										ARN
	1h	5.58	3.96	7.11	3.405	4.29	2.295					2.71	2.43	4.595	3.155	3.81	3.945	2.01	3.78	2.305	2.265
	3h	4.015	5.445	4.29	3.565	4.76	2.485					6.665	5.79	3.315	8.46	4.685	3.94	3.97	9.48	2.485	5.95
	6h	3.99	3.175	3.43	4.865	4.265	4.87					7.415	7.575	4.8	7.08	6.36	10.94	7.03	6.355	2.84	4.525
	Fig.1 F1		Wt												Naaa +/-												Naaa -/-
	BL		15	15	15	15	13.36	12.76	13.3	13.33	14.13	11.73			15	15	14.4	15	13.1	15	12.5	9.71	12.74	13.2	13.05		15	9.77	15	12.09	13.97	15	13.57	12.08	11.76	14.41	9.53
	1h		2.685	3.93667	8.535	4.595	6.32	1.78	6.38	6.26	5.52	10.44			4.645	4.535	5.38	8.855	4.02	7.025	9.56	4.68	5.18	4.31	7.06		10.315	3.27	4.115	11.41	9.955	7.47	3.74	3.77	7.1	10.81	3.64
	3h		2.8	7.495	4.19	3.885	9.165	2.72	5.18	6.51	5.17	9.75			11.24	5.015	8.615	8.915	7.88	11.175	12.975	3.495	5.095	6.995	9.03		8.935	9.045	5.295	10.865	9.713	11.16	10.825	9.87	8.365	8.05	5.26
	6h		10.435	5.765	3.61	5.66	8.9	8.175	5.365	9.85	11.74	7.26			8.625	6.19	8.845	12.02	5.695	8.395	12.295	7.115	9.325	12.77	12.365		15	13.12	8.805	12.315	11.715	10.925	8.72	11.61	10.355	12.925	4.325
	d1		12.37	9.72	13.5	12.51	12.9	14.68	15	8.36	11.66	9.56			5.47	9.87	12.88	11.22	12.512	14.79	15	12.99	13.05	15	15		13.39	14.96	11.63	11.13	10.37	15	13.9	14.77	13.25	14.23	13.21
	Fig.1 F2		Wt												Naaa +/-												Naaa -/-
	1h		2.31	2.05	4.24	2.02	4.58	5.81	7.78	2.855	4.49	6.355			5.725	7.67	2.465	4	3.885	11.44	2.96	10.115	9.365	8.1	5.18		11.7	4.025	10.97	10.255	9.1	10.86	11.455	11.715	12.66	7.795	13.4
	3h		4.445	2.845	4.175	4.16	4.56	5.42	4.47	5.26	4.58	3.865			13.25	12.99	7.785	11.68	12.765	11.335	15	14.215	10.625	9.605	6.505		11.525	14.33	11.54	12.915	14.515	12.085	13.655	8.635	13.26	15	11.4
	6h		3.4	6.655	4.655	2.215	5.2	4.595	6.9	2.715	13.555	1.765			12.49	8.19	12.67	10.49	10.65	14.605	13.16	4.065	9.065	10.72	14.265		6.65	11.125	8.79	12.15	9.76	9.795	9.75	10.95	13.1	10.375	11.785
