# Supplementary material for: NAAA-regulated lipid signaling in monocyte-derived cellscontrols the induction of hyperalgesic priming
Source: Research Square preprint supplement (doi:10.21203/rs.3.rs-3263903/v1), 2023-08-19
Supplement: Supplementary file 5 [file 30f7dcc9be16666c854646d0.xlsx]

## Sheet: Figure 3
	Fig.3 C	Naaafl/fl			NaaaCD11b-/-
	CD11b-	92.6654	107.931	121.85	107.557	92.3448	77.6524
	Monocytes	92.6614	109.054	98.2848	2.49747e-06	2.49747e-06	2.49747e-06
	Whole blood	90.8394	100.793	101.846	94.3693	98.3768	114.583
	Fig.3 D	Naaafl/fl								NaaaCD11b-/-
	BL	15	12.79	12.57	12.945	13.205	11.83	14.65	12.265	11.705	13.135	10.645	13.385	12.665	11.77	12.605
	1h	5.5	6.615	5.77	4.355	3.125	4.785	4.855	2.385	6.365	7.125	3.745	4.635	11.22	5.07	6.37
	3h	4.535	6.15	6.46	5.465	2.925	3.335	5.92	3.805	11.65	11.81	11.235	12.29	11.03	6.215	4.315
	6h	3.43	5.76	3.72	4.865	2.245	2.52	4.365	3.91	10.01	11.08	11.8	2.615	15	10.34	7.795
	d1	8.82	12.465	14.13	10.815	10.5	7.515	7.98	10.515	12	11.785	11.83	13.04	11.02	8.725	11.875
	Fig.3 E	Naaafl/fl								NaaaCD11b-/-
	1h	3.38	5.515	7.245	3.2	2.725	3.265	4.98	4.605	3.27	10.875	8.82	7.15	2.375	2.965	3.085
	3h	3.415	4.135	4.82	6.385	3.965	3.765	4.2	4.315	9.05	11.83	10.565	10.125	8.465	7.71	7.185
	6h	4.905	4.53	4.375	8.315	3.59	3.79	3.255	3.305	9.125	14.32	8.86	11.83	10.99	9.765	8.695
	Fig.3 F	Wt								NaaaCD11b+
	BL	13.6	15	11.01	13.67	12.9	12.1	13.9	12.7	13.19	13.9	12.6	14.9	12.6	14.4	15	12.5
	1h	13.47	13.61	11.78	10.48	12.53	14.06	12.23	12.05	14.29	12.9	15	12.47	13.98	14.6	9.82	12.98
	3h	12.42	10.97	12.12	12.12	12.29	11.3	13	11.26	11.56	13.39	10.87	11.82	10.09	9.88	12	12.49
	6h	11.27	10.71	12.08	13.88	14.57	12.61	11.15	13.2	10.55	13.8	10.75	10.33	11.3	12.43	15	11.11
	d1	12.11	13.87	14.33	11.42	12	15	12.67	11.8	12.19	15	12.17	13.89	11.32	15	11.97	12.63
	Fig.3 G	Wt								NaaaCD11b+
	1h	5.2	7.74	10.81	4.64	2.99	4.02	3.42	9.48	4.92	7.35	4.57	4.23	5.38	6.28	4.94	4.59
	3h	3.87	6.35	9.32	6.13	3.35	1.82	6.67	6.13	7.26	6.69	4.13	3.45	6	7.12	5.46	2.56
	6h	14.17	15	14.69	15	13.1	15	12.71	15	3.92	1.8	4	6.05	4.75	3.01	3.19	8.3
	d1	14.78	14.95	13.33	11.46	15	15	13.85	10.31	3.8	4.71	2.4	5.2	3.79	1.53	4.65	10.85
