# Supplementary material for: NAAA-regulated lipid signaling in monocyte-derived cellscontrols the induction of hyperalgesic priming
Source: Research Square preprint supplement (doi:10.21203/rs.3.rs-3263903/v1), 2023-08-19
Supplement: Supplementary file 6 [file 31fb07a2c4d1c8f2483ced2c.xlsx]

## Sheet: Figure 5
	Fig.5 C	Clo	PBS
	Ly6C high Monocytes	6.09	9.6
		6.93	11.18
		6.27	12.21
	Ly6C low Monocytes	2.9	2.21
		2.76	3.49
		3.59	3.03
	Fig.5 D	Clo	PBS
	Neutrophils	32.7	21.91
		32.47	13.87
		36.93	22.26
	Fig.5 F1	PBS								Clo
	BL	12.405	10.45	13.02	9.56	12.35	10.855	12.185	10.215	10.46	12.155	10.09	11.405	12.94	11.525	14.31	12.06
	1h	4.445	5.985	5.485	5.365	4.555	4.64	3.09	5.35	10.7	10.78	11.24	12.43	13.565	13.84	12.425	11.465
	3h	3.445	5.315	5.425	5.135	4.375	3.42	3.415	3.425	10.21	9.18	10.84	8.755	11.015	11.345	11.525	11.81
	6h	3.63	5.54	4.11	12.215	3.02	3.935	4.34	4.035	9.76	11.68	10.96	11.275	10.47	11.755	5.8	12.3
	d1	11.985	12.355	9.925	12.985	10.755	10.72	10.39	13.66	10.675	12.84	10.71	11.15	10.365	8.855	12.865	9.46
	Fig.5 F2	PBS								Clo
	1h	3.825	2.295	4.095	6.51	3.92	5.96	3.8	4.92	5.455	7.815	2.325	9.91	9.655	8.125	10.96	9.12
	3h	5.5	2.385	2.76	3.92	3.775	4.385	3.6	7.41	3.785	9.34	9.255	7.37	10.33	12.005	14.21	10.23
	6h	3.78	2.91	3.27	8.325	4.7	3.095	3.86	5.76	10.155	11.68	8.31	14.145	8.37	13.695	12.59	10.13
	Fig.5 I	Ctrl	PLX
	Ly6C high Monocytes	3.02	0.93
		2.42	0.69
			1.18
		5.23	1.25
	Ly6C low Monocytes	3.58	0.47
		2.64	0.42
			0.57
		4.96	0.86
	Fig.5 J	Ctrl	PLX
	Neutrophils	6.07	2.36
		5.64	1.34
			2.58
		6.71	3.38
	Fig.5 L1	Ctrl								PLX
	BL	12.67	9.4	14.6	10.23	12.795	10	10.195	9.875	10.47	13.26	10.52	12.935	14.175	12.145	11.37	11.035	12.935	11.165
	1h	6.005	4.795	4.99	3.57	5.45	3.285	2.425	4.015	9.825	9.82	11.71	11.355	10.92	4.02	14.01	10.545	7.47	10.485
	3h	6.87	5.745	5.4	5.605	6.005	2.135	3.605	5.27	10.895	8.995	12.43	11.15	13.37	5.23	9.8	13.15	10.265	10.625
	6h	11.39	4.195	2.275	4.025	2.69	2.535	4.495	4.14	12.815	8.99	10.44	9.93	13.96	3.205	12.77	7.95	9.815	9.805
	d1	12.81	12.505	12.775	10.79	11.04	5.535	10.06	4.21	12.125	8.52	10.4	12.045	9.04	11.715	11.55	7.715	5.905	9.805
	Fig.5 L2	Ctrl								PLX
	1h	3.545	3.425	4.585	3.76	2.445	2.27	2.61	3.66	5.73	7.04	5.515	7.63	7.315	4.045	4.87	4.965	5.505	7.14
	3h	4.57	2.585	2.33	3.565	2.575	2.49	1.99	3.265	8.565	6.375	7.225	8.77	7.475	5.095	11.645	5.32	8.93	7.62
	6h	6.71	4.67	2.53	4.35	3.035	3.07	2.32	4.635	8.43	10.04	8.015	10.775	7.235	8.31	12.23	6.2	9.76	6.555
