# Supplementary material for: NAAA-regulated lipid signaling in monocyte-derived cellscontrols the induction of hyperalgesic priming
Source: Research Square preprint supplement (doi:10.21203/rs.3.rs-3263903/v1), 2023-08-19
Supplement: Supplementary file 7 [file 66cf0502224d34a5582547df.xlsx]

## Sheet: Figure S8
		Fig.S8 A			Fig.S8 B
		Ctrl	PLX5622		Ctrl	PLX5622
		18	19		3.835	5.19
		23	12		4.435	4.485
		15	13		4.03	4.125
		18	14		4.955	4.39
		19	22		3.97	4.07
		18	19		4.955	4.36
		13	19		4.265	3.315
		27	24		4.185	4.395
			26			4.475
			10			4.555
