# Supplementary material for: NAAA-regulated lipid signaling in monocyte-derived cellscontrols the induction of hyperalgesic priming
Source: Research Square preprint supplement (doi:10.21203/rs.3.rs-3263903/v1), 2023-08-19
Supplement: Supplementary file 8 [file 834d0b5c5199a6dd6aa5d546.xlsx]

## Sheet: Figure S6
		Fig.S6 A			Fig.S6 B			Fig.S6 C			Fig.S6 D
		Naaafl/fl	NaaaCD11b -/-		Naaafl/fl	NaaaCD11b -/-		Pparafl/fl	PparaCD11b -/-		Pparafl/fl	PparaCD11b -/-
		13	13		3.98	4.03		27	19		3.045	2.685
		13	12		2.765	3.645		26	22		2.14	3.57
		15	22		2.66	0.89		32	21		2.6	3.77
		12	14		5.21	3.16		18	28		3.16	2.955
		15	16		1.685	2.49		20	23		2.98	2.85
									21			4.05
