# Supplementary material for: NAAA-regulated lipid signaling in monocyte-derived cellscontrols the induction of hyperalgesic priming
Source: Research Square preprint supplement (doi:10.21203/rs.3.rs-3263903/v1), 2023-08-19
Supplement: Supplementary file 9 [file 8a40a1e563394e00376ebcd9.xlsx]

## Sheet: Figure S7
		Fig.S7 A	Microglia		Fig.S7 B	Microglia
		PBS	Clodronate		Ctrl	PLX5622
		3.63	3.24576		3.55	0.2
		4.7642	2.65033		2.68	0.2
		3.91113	4.03675			0.13
					2.27	0.11
