# Supplementary material for: NAAA-regulated lipid signaling in monocyte-derived cellscontrols the induction of hyperalgesic priming
Source: Research Square preprint supplement (doi:10.21203/rs.3.rs-3263903/v1), 2023-08-19
Supplement: Supplementary file 10 [file 9cf896fc08f91f038bf98410.xlsx]

## Sheet: Figure 4
	Fig.4 C	Pparafl/fl		PparaCD11b -/-
	CD11b-	100.866	99.1336	118.3	99.4778
	Monocytes	102.426	97.5745	1.31215e-07	1.31215e-07
	Whole Blood	94.2878	105.712	88.5855	104.619
	Fig.4 D	Pparafl/fl								PparaCD11b-/-
	BL	15	15	14.435	11.48	14.97	14.04	11.265	15	15	14.015	11.745	14.225	15	14.455	15	10.815
	1h	15	13.55	13.21	10.52	10.29	9.44	15	12.32	15	13.09	13.45	8.21	13.21	11.81	14.02	13.26
	3h	15	15	15	12.15	12.55	9.11	9.8	10.46	15	13.66	10.18	11.21	13.98	13.21	15	12.73
	6h	11.44	10.9	11	12.93	10.98	15	10.98	12.22	12.34	13.16	11.59	8.91	12.98	13.59	13.37	10.05
	d1	12.09	12.14	12.11	13.03	9.86	12.31	10.27	9.41	14.8	15	12.08	15	15	15	14.2	12.735
	Fig.4 E	Pparafl/fl								PparaCD11b-/-
	1h	2.66	4.335	6.775	2.56	2.45	3.785	4.865	4.495	5.795	3.74	4.625	3.115	3.07	2.705	2.96	4.3
	3h	3.17	2.935	6.485	5.495	4.115	4.855	7.585	5.175	4.86	3.265	7.49	6.045	4.69	5.15	2.955	3.045
	6h	10.55	7.875	9.435	12.99	9.51	10.98	10.955	11.565	5.1	2.54	5.635	7.46	5.605	5.7	4.895	2.34
	d1	7.585	11.21	10.9	10.595	9.515	9.71	10.325	12.08	6.455	9.48	4.695	8.14	10.96	3.955	5.93	4.84
	Fig.4 F1	Veh										ARN
	BL	13.37	13.8	12.54	9.85	13.88	12.235	14.315	9.35	14.595	13.575	10.59	13.1	13.46	13.345	13.85	14.105	14.905	12.73	10.425	13.385
	1h	6.82	5.51	7.13	6.33	7.685	2.665	4.085	4.59	6.845	2.485	6.85	4.66	5.28	6.285	5.83	7.41	6.345	6.92	2.71	5.84
	3h	6.87	8.36	5.38	3.06	9.685	6.995	5.02	6.805	5.745	3.33	5.86	5.66	5.46	3.725	4	7.205	5.125	3.56	3.36	2.475
	6h	6.43	5	15	4.175	10.29	2.725	4.62	6.13	6.925	7.955	3.12	15	7.005	3.525	3.48	7.855	7.875	3.635	4.32	4.59
	d1	8.67	13.68	15	15	12.12	13.35	7.76	12.15	13.24	15	15	15	13.515	8.455	13.905	6.71	13.77	12.85	12.395	12.54
	d2	12.315	14.405	10.44	14.29	13.095	8.41	9.49				11.15	10.325	10.91	15	13.705	13.065	13.79
	Fig.4 F2	Veh										ARN
	1h	7.74	3.86	4.27	3.96	7.11	3.405	4.29	2.295	3.69	6.71	9.42	11.07	4.995	6.84	6.63	6.26	11.78	10.995	5.625	4.475
	3h	3.87	3.955	5.72	5.445	4.29	3.565	4.76	2.485	4.145	7.4	13.885	15	8.125	10.775	8.65	2.365	13.04	12.26	11.355	11.93
	6h	9.865	15	5.09	3.175	3.43	4.865	4.265	4.87	3.995	4.145	14.18	12.44	10.665	10.03	6.615	5.595	11.085	12.275	11.98	9.045
	Fig.4 G1	Veh							ARN
	BL	13.585	9.685	12.895	13.365	13.19	10.375	12.91	12.86	10.23	12.405	14.105	13.415	14.28	12.33
	1h	2.96	5.96	4.655	4.845	6.47	4.99	4.99	3.115	7.045	6.14	7.3	4.195	5.91	7.09
	3h	4.305	5.435	5.34	4.74	5.025	5.35	3.225	2.575	6.5	3.69	2.715	6	6.52	2.085
	6h	6.73	6.175	5.31	4.495	6.135	6.91	4.11	2.395	5.325	4.425	7.215	6.26	4.11	4.32
	d1	3.785	8.965	6.805	8.67	4.285	7.28	4.495	3.205	6.39	6.69	3.375	8.325	6.49	10.19
	d2	11.21	9.37	9.755	12.165	11.015	9.54	9.853	11.825	13.255	9.385	11.75	12.21	13.55	10.075
	Fig.4 G2	Veh							ARN
	1h	3.5	6.655	5.49	4.255	3.365	4.515	4.53	2.725	8.08	11.27	2.62	3.925	5.53	5.43
	3h	4.21	9.755	2.975	4.685	4.995	4.965	5.21	3.125	7.24	9.685	4.795	5.895	4.91	5.565
	6h	4.28	4.825	3.75	4.615	6.44	8.59	5.94	6.025	6.35	5.46	5.285	8.275	11.615	5.25
