# Supplementary material for: NAAA-regulated lipid signaling in monocyte-derived cellscontrols the induction of hyperalgesic priming
Source: Research Square preprint supplement (doi:10.21203/rs.3.rs-3263903/v1), 2023-08-19
Supplement: Supplementary file 11 [file b37f370def31ea9d45c8f4e9.xlsx]

## Sheet: Figure 2
	Fig.2 A	Veh-ARN								GW6471-ARN								Veh-Veh
	1h	6.79	10.48	9.075	6.915	3.39	8.065	7.235	9.605	3.955	5.3	3.62	2.7	3.505	2.43	4.8	3.635	3.02	4.395	5.81	5.24	4.29	9.22	4.07	6.785
	3h	9.785	4.69	12.4	14.38	12.255	12.11	12.275	14.285	10.155	6.125	7.635	4.23	4.225	2.615	5.505	4.21	4.845	5.96	5.675	4.26	6.165	5.045	2.98	6.665
	6h	12.835	6.27	12.46	11.775	10.065	10.995	13.79	13.725	4.155	10.14	5.235	3.825	5.4	2.55	4.35	2.85	6.51	3.58	5.9	5.2	4.81	5.085	12.36	6.23
	Fig.2 B	Veh-ARN								T0070907-ARN								Veh-Veh
	1h	6.79	10.48	9.075	6.915	3.39	8.065	7.235	9.605	4.655	5.38	6.475	2.745	3.325	4.87	3.62		3.02	4.395	5.81	5.24	4.29	9.22	4.07	6.785
	3h	9.785	4.69	12.4	14.38	12.255	12.11	12.275	14.285	10.31	8.415	9.13	9.985	9.325	8.01	4.255		4.845	5.96	5.675	4.26	6.165	5.045	2.98	6.665
	6h	12.835	6.27	12.46	11.775	10.065	10.995	13.79	13.725	9.15	11.555	10.855	8.57	10.55	9.65	8.85		6.51	3.58	5.9	5.2	4.81	5.085	12.36	6.23
	Fig.2 C	Veh-ARN								AM630-ARN								Veh-Veh
	1h	6.79	10.48	9.075	6.915	3.39	8.065	7.235	9.605	2.8	6.01	10.21	8.37	10.425	11.03	7.93		3.02	4.395	5.81	5.24	4.29	9.22	4.07	6.785
	3h	9.785	4.69	12.4	14.38	12.255	12.11	12.275	14.285	9.455	15	11.83	12.375	9.975	10.945	5.27		4.845	5.96	5.675	4.26	6.165	5.045	2.98	6.665
	6h	12.835	6.27	12.46	11.775	10.065	10.995	13.79	13.725	13.095	15	10.25	14.375	13.425	12.375	10.26		6.51	3.58	5.9	5.2	4.81	5.085	12.36	6.23
	Fig.2 D	PEA								Veh
	1h	3.075	9.76	7.135	2.755	11.3	10.8	4.955	4.4	2.01	3.59	4.99	5.5	2.19	9.59	3.36	6.23
	3h	8.57	12.43	7.9	14.625	10.64	9.32	6.35	11.49	5.12	6.24	6.85	3.66	6.46	6.25	3.66	5.45
	6h	12.22	10.325	13.21	13.19	12.705	14.895	13.625	9.405	6.1	2.68	5.29	4.06	3.77	3.95	10.29	5.02
	Fig.2 E	GW7647								Veh
	1h	12.805	4.7	11.72	4.345	11.115	8.84	4.71	9.65	2.01	3.59	4.99	5.5	2.19	9.59	3.36	6.23
	3h	12.225	5.495	11.82	11.695	10.865	7.415	10.235	11.3	5.12	6.24	6.85	3.66	6.46	6.25	3.66	5.45
	6h	12.08	3.63	12.325	13.73	13.68	12.445	11.6	13.515	6.1	2.68	5.29	4.06	3.77	3.95	10.29	5.02
	Fig.2 F	Plasma_ARN726					Spinal Cord_ARN726
	0 min	0.617	0.259	0.269	0.577	0.332	0.05	0.029	1.939	0
	15 min	82.063	86.2	103.906	102.587	245.263	4.917	11.819	10.207	9.704	19.605
	30 min	10.979	5.367	5.999	17.922	11.93	6.391	2.463	5.097	6.759	8.752
	60 min		14.446	2.456	1.603	1.256	7.572	4.796	3.002	3.414
	120 min	0.334	0.219	0.494	0.333	0.633	0.098	2.133	0	0.032	0.271
	Fig.2 G	Plasma_PEA						Fig.2 J	Spinal Cord_PEA
	0 min	1.28882	1.67395	1.73702	1.15778	1.56592		0 min	164.43	151.16	127.32	108.21
	15 min	1.93145	2.56927	2.19856	2.21889	2.04249		15 min	95.26	103.73	100.51	111.34	122.86
	30 min	1.78451	1.82676	1.494	1.56876	1.83603		30 min	129.35	118.79	99.13	158.08	138.62
	60 min		2.51523	1.29566	1.77915	1.6532		60 min	172.95	130.44	141.63	222.31
	120 min	1.11119	1.14173	1.21616	1.34585	1.42842		120 min	77.82	124.21	178.79	127.98	104.45
	Fig.2 H	Plasma_OEA						Fig.2 K	Spinal Cord_OEA
	0 min	1.43932	1.52018	1.2539	1.53857	1.74897		0 min	135.12	110.44	120.71	94.38
	15 min	2.3521	2.24717	2.35998	1.92917	2.17657		15 min	106.69	113.18	113.04	110.95	122.86
	30 min	1.81027	1.35824	1.57201	1.77892	1.85961		30 min	133.35	123.26	110.85	127.81	152.83
	60 min		1.38522	1.39809	1.76982	1.85136		60 min	208.85	135.49	111.81	152.79
	120 min	1.41645	1.25845	1.0648	1.33296	1.42006		120 min	117.78	126.31	118.11	108.5	96.2
	Fig.2 I	Plasma_AEA						Fig.2 L	Spinal Cord_AEA
	0 min	0.16468	0.177637	0.178026	0.170612	0.170732		0 min	8	5.85	10.55	9.36
	15 min	0.179824	0.973653	0.191997	0.174093	0.220135		15 min	8.47	6.99	6.94	6.88	7.95
	30 min	0.16501	0.109364	0.137307	0.114204			30 min	9.06	7.42	6.99	8.98	10
	60 min		0.220049	0.105858	0.154668	0.140854		60 min	12.83	7.68	12.68	23.88
	120 min	0.172548	0.11579	0.076933	0.0890267	0.116158		120 min	6.64	6.68	7.84	6.13	5.35
	Fig.2 M	Dose-response of the effects of ARN726 on HP
	Veh	-1.31786	-11.1716	-8.0885	9.26127	2.00701	9.32173
	0	-0.652884	47.8298	35.558	31.2659	12.0421	-1.31786	-10.4461	-25.1965
	0.477121	12.707	18.45	33.5631	45.3512	106.287	61.9151	55.9304	23.8907
	1	120.916	109.793	74.1869	64.4541	7.93133	58.288	52.7868	40.5151
	1.47712	85.9146	5.75505	84.0406	122.428	51.5778	83.3152	72.3734
	Fig.2 N	Veh								ARN726
	1h	10.095	6.24	5.805	4.54	5.57	4.58	2.96		4.83	3.545	4.315	10.135	5.83	4.495	4.78	4.68
	3h	11.605	6.87	4.35	4.07	5.07	4.355	4.745		4.06	4.425	5.55	6.51	4.64	4.815	3.815	4.65
	6h	8.525	5.455	5.185	3.7	6.02	5.985	4.045		3.45	7.035	3.855	5.065	5.935	7.215	6.095	4.125
