# Supplementary material for: NAAA-regulated lipid signaling in monocyte-derived cellscontrols the induction of hyperalgesic priming
Source: Research Square preprint supplement (doi:10.21203/rs.3.rs-3263903/v1), 2023-08-19
Supplement: Supplementary file 12 [file c7354887e5b46c27d915fb7b.xlsx]

## Sheet: Figure S5
	Fig.S5 A	Veh						ARN 726 (1 mg/kg)								ARN 726 (3 mg/kg)								ARN 726 (10 mg/kg)								ARN 726 (30 mg/kg)
	BL	14.59	9.85	13.88	12.235	14.315	9.35	14.68	13.03	12.92	11.36	11.305	12.67	11.085	11.84	12.86	10.43	10.85	13.185	13.85	10.835	12.335	14.7	15	13.33	13.67	12.95	10.035	9.145	12.42	11.875	10.655	12.39	13.82	14.435	9.02	12.245	13.905
	1h	5.205	6.33	7.685	2.665	4.085	4.59	5.12	5.235	4.945	3.59	4.245	6.3	7.15	3.16	5.405	3.29	5.41	8.755	7.38	6.57	4.05	3.78	9.39	4.2	7.355	6.08	5.21	5.425	6.14	5.58	6.52	4.655	10.825	5.74	4.605	5.96	4.72
	3h	5.24	3.06	9.685	6.995	5.02	6.805	4.755	6.4	5.215	2.69	4.075	6.195	3.92	3.725	5.605	5.96	4.66	5.375	5.5	5.375	4.105	3.26	9.675	6.345	4.04	3.265	4.505	6.25	5.795	5.27	3.54	4.84	9.06	6.07	6.39	6.9	4.675
	6h	4.97	4.175	10.29	2.725	4.62	6.13	5.76	5.025	4.055	5.305	5.325	3.525	4.205	3.605	4.68	6	6.05	5.53	7.255	4.685	5.055	4.745	7.465	5.275	9.91	3.155	6.985	6.225	4.965	7.04	5.315	7.58	4.825	10.83	3.475	6.105	4.115
	d1	15	15	12.12	13.35	7.76	12.15	12.33	14.99	10.245	12.725	12.995	4.565	10.58	6.085	10.86	11.945	9.185	9.14	13.4	8.68	9.37	10.075	13.175	10.665	12.04	7.89	8.905	8.56	6.85	15	12.675	13.9	14.79	15	13.405	13.905	6.17
	Fig.S5 B	Veh						ARN 726 (1 mg/kg)								ARN 726 (3 mg/kg)								ARN 726 (10 mg/kg)								ARN 726 (30 mg/kg)
	1h	5.58	3.96	7.11	3.405	4.29	2.295	4.73	5.2	3.915	8.24	4.33	6.805	4.81	5.965	4.535	14.075	9.245	8.71	14.205	7.915	11.085	4.265	13.045	12.845	4.49	5.72	5.39	11.885	9.76	15	10.525	6.43	13.47	13.515	8.595	10.77	10.47
	3h	4.015	5.445	4.29	3.565	4.76	2.485	5.53	6.16	5.47	3.6	5.55	3.225	3.955	4.41	4.41	4.315	3.39	5.23	11.125	4.555	12.725	9.855	14.065	11.285	9.54	8.195	6.78	10.05	5.17	11.69	8.635	4.86	12.08	10.7	5.485	9.08	6.83
	6h	3.99	3.175	3.43	4.865	4.265	4.87	4.045	8.055	7.04	6.685	5.095	3.99	3.235	2.015	5.15	5.625	6.875	7.85	12.89	9.22	8.725	6.075	14.1	13.18	10.235	9.43	4.755	8.92	8.465	7.45	11.205	4.575	11.05	14.225	8.365	10.99	10.085
